# Supplementary material for: Superconductivity in Ti4O7 and γ-Ti3O5 films
Source: PubMed Central journal article supplement (PMC5624959; doi:10.1038/s41598-017-12815-4), 2017-10-02
Supplement: 41598_2017_12815_MOESM1_ESM.pdf [file 41598_2017_12815_MOESM1_ESM.pdf]

Supplementary Information

**Superconductivity in  $\text{Ti}_2\text{O}_7$  and  $\gamma\text{-Ti}_2\text{O}_3$  films**

K. Yoshimatsu<sup>1,\*</sup>, O. Sakata<sup>2,3</sup>, and A. Ohtomo<sup>1,3,\*</sup>

<sup>1</sup>*Department of Chemical Science and Engineering, Tokyo Institute of Technology, 2-12-1 Ookayama, Meguro-ku, Tokyo 152-8552, Japan*

<sup>2</sup>*Synchrotron X-ray Station at SPring-8, National Institute for Materials Science (NIMS), Sayo, Hyogo 679-5148, Japan*

<sup>3</sup>*Materials Research Centre for Element Strategy (MCES), Tokyo Institute of Technology, Yokohama 226-8503, Japan*

PACS: 74.78.-w, 73.50.-h, 61.05.cp, 71.38.Mx

\*Author to whom correspondence should be addressed; Electronic mail: k-yoshi@apc.titech.ac.jp

## Growth of TiO and Ti<sub>2</sub>O<sub>3</sub> films using pulsed laser deposition under Ar atmosphere.

In order to demonstrate the reductive effects of Ar gas, we have grown TiO and Ti<sub>2</sub>O<sub>3</sub> films by using pulsed laser deposition under Ar atmosphere. Here, these films were grown at 1000°C and under Ar:  $1 \times 10^{-2}$  Torr and  $1 \times 10^{-3}$  Torr, respectively. Figure S1 shows out-of-plane XRD patterns for TiO and Ti<sub>2</sub>O<sub>3</sub> films on  $\alpha$ -Al<sub>2</sub>O<sub>3</sub> (0001) substrates. The single peak was observed at  $2\theta \approx 37.6^\circ$  and  $39.2^\circ$ , corresponding to  $d = 2.396 \text{ \AA}$  and  $2.296 \text{ \AA}$ , respectively, except for  $\alpha$ -Al<sub>2</sub>O<sub>3</sub> 0006 reflections observed at  $2\theta = 41.67^\circ$ . The former peak was identified as TiO 111 reflection [S1] and the latter one was identified to Ti<sub>2</sub>O<sub>3</sub> 0006 reflection [S2]. The XRD patterns suggest that the single-phase TiO and Ti<sub>2</sub>O<sub>3</sub> films are successfully grown under Ar atmosphere by laser ablation of the target with the identical TiO<sub>x</sub> ceramic target.

Surface morphology strongly supports the formation of TiO and Ti<sub>2</sub>O<sub>3</sub> films. The insets of Fig. S1 show AFM images of the TiO and Ti<sub>2</sub>O<sub>3</sub> films. As for the TiO film, the triangular facets were clearly observed, reflecting fully epitaxial growth on the hexagonal substrate as well as a rock-salt type structure exposing more stable (100) facets. The Ti<sub>2</sub>O<sub>3</sub> film exhibited a trace of the spiral growth: islands surrounded by multilevel terraces originating from screw or half-loop dislocations [S3].

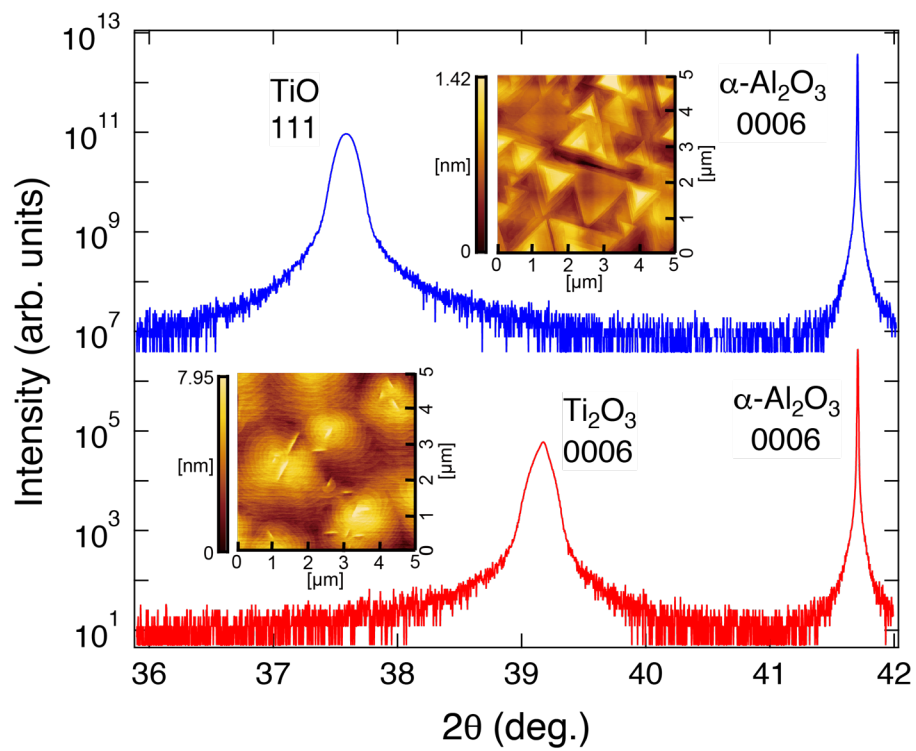

**Figure S1.** Out-of-plane XRD patterns for TiO and Ti<sub>2</sub>O<sub>3</sub> films. The insets show atomic force microscopic images of the films.

### X-ray diffraction (XRD) measurements for the $\text{Ti}_4\text{O}_7$ films

Figure S2 shows contour map of film- and substrate-reflections intensity, plotted against scattering angle  $2\theta$  and tilt angle  $\chi$ , for the  $\text{Ti}_4\text{O}_7$  films grown under  $P_{Ar} = 1 \times 10^{-3}$  Torr (superconducting  $\text{Ti}_4\text{O}_7$ ). The peak locations corresponding to the film and substrate reflections were verified. Based on this survey, we have performed synchrotron radiation XRD at BL15XU in SPring-8 for both the insulating and superconducting  $\text{Ti}_4\text{O}_7$  films. The measured reflection profiles were shown in Figs. S3 (a–h) (insulating  $\text{Ti}_4\text{O}_7$  film) and Figs. S4 (a–h) (superconducting  $\text{Ti}_4\text{O}_7$  film). Signal to noise ratio was significantly improved using high-flux synchrotron radiation. From the  $d$  values of interplanar spacing distances and  $\chi$  angles, the Miller indices were assigned as listed in Tables S1. For the  $\text{Ti}_4\text{O}_7$  134 reflection, the XRD azimuth  $\phi$ -scans around the film normal were also performed to reveal the rotational domains of the films (Figs. S5). The peaks appeared every  $90^\circ$ , indicating four-fold rotational domains in the films. From these XRD analyses, the in-plane (out-of-plane) epitaxial relationships between the films and substrate were determined to be  $\text{Ti}_4\text{O}_7$  [010] //  $(\text{LaAlO}_3)_{0.3}$ – $(\text{SrAl}_{0.5}\text{Ta}_{0.5}\text{O}_3)_{0.7}$  (LSAT) [010], [001] and  $\text{Ti}_4\text{O}_7$  [0–10] // LSAT [010], [001] ( $\text{Ti}_4\text{O}_7$  [101] // LSAT [100]). Using the  $d$  values and Miller indices, we evaluated the lattice parameters of the  $\text{Ti}_4\text{O}_7$  films in Table S2.

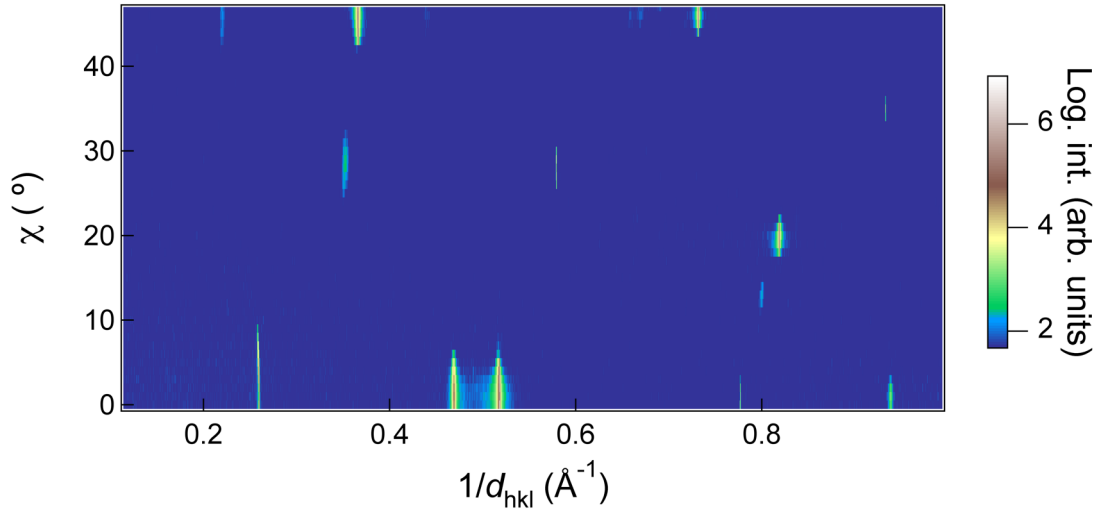

**Figure S2.** Contour map of film- and substrate-reflections intensity, constructed from  $2\theta$ - $\theta$  profiles measured by stepwisely varying tilt angle  $\chi$ , for the superconducting  $\text{Ti}_4\text{O}_7$  film grown on the LSAT (100) substrate.

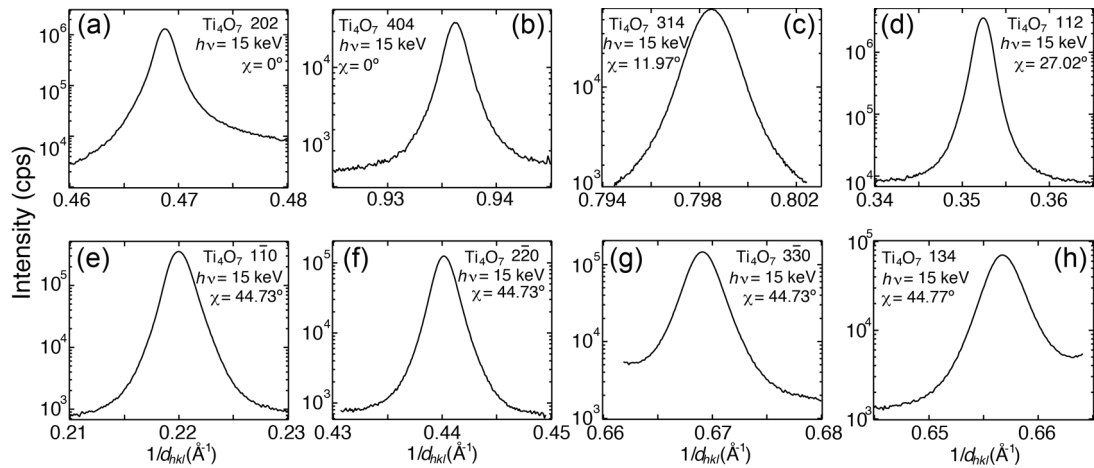

**Figure S3.** Some of the film-reflection profiles measured for the insulating  $\text{Ti}_4\text{O}_7$  film. (a) 202, (b) 404, (c) 314, (d) 112, (e) 1–10, (f) 2–20, (g) 3–30, and (h) 134 reflections.

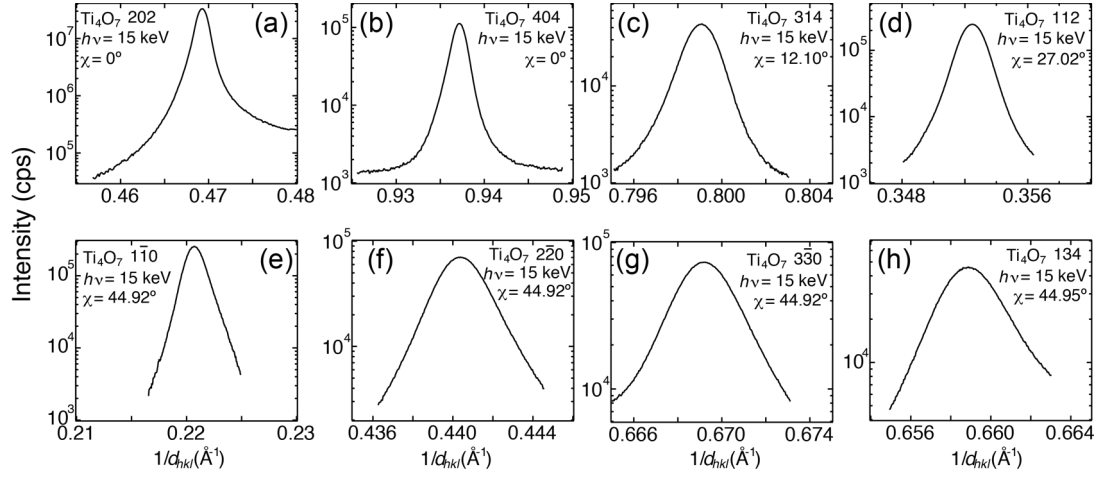

**Figure S4.** Some of the film-reflection profiles measured for the superconducting  $\text{Ti}_4\text{O}_7$  film. (a) 202, (b) 404, (c) 314, (d) 112, (e) 1–10, (f) 2–20, (g) 3–30, and (h) 134 reflections.

**Table S1.** List of Miller indices,  $d$  values of interplanar spacing distances, and tilt angle  $\chi$  for the insulating (left) and superconducting (right)  $\text{Ti}_4\text{O}_7$  films.

| No | $hkl$ | $d_{hkl}$ (Å) | $\chi$ (°) | No | $hkl$ | $d_{hkl}$ (Å) | $\chi$ (°) |
|----|-------|---------------|------------|----|-------|---------------|------------|
| 1  | 202   | 2.133         | 0          | 1  | 202   | 2.131         | 0          |
| 2  | 404   | 1.068         | 0          | 2  | 404   | 1.067         | 0          |
| 3  | 314   | 1.252         | 11.97      | 3  | 314   | 1.251         | 12.10      |
| 4  | 112   | 2.837         | 27.02      | 4  | 112   | 2.837         | 27.02      |
| 5  | 1–10  | 4.544         | 44.73      | 5  | 1–10  | 4.531         | 44.92      |
| 6  | 2–20  | 2.272         | 44.73      | 6  | 2–20  | 2.274         | 44.92      |
| 7  | 3–30  | 1.494         | 44.73      | 7  | 3–30  | 1.457         | 44.92      |
| 8  | 134   | 1.522         | 44.77      | 8  | 134   | 1.518         | 44.95      |

**Table S2.** List of lattice parameters of insulating and superconducting  $\text{Ti}_4\text{O}_7$  films. The lattice parameters of bulk  $\text{Ti}_4\text{O}_7$  are also listed for comparison [1,2].

|              | Insulating<br>$\text{Ti}_4\text{O}_7$ film | Superconducting<br>$\text{Ti}_4\text{O}_7$ film | Bulk<br>$\text{Ti}_4\text{O}_7$ |
|--------------|--------------------------------------------|-------------------------------------------------|---------------------------------|
| $a$ (Å)      | 5.52                                       | 5.52                                            | 5.597                           |
| $b$ (Å)      | 7.12                                       | 7.11                                            | 7.125                           |
| $c$ (Å)      | 20.43                                      | 20.46                                           | 20.429                          |
| $\alpha$ (°) | 67.5                                       | 67.5                                            | 67.7                            |
| $\beta$ (°)  | 57.3                                       | 57.2                                            | 57.16                           |
| $\gamma$ (°) | 108.8                                      | 108.8                                           | 108.76                          |

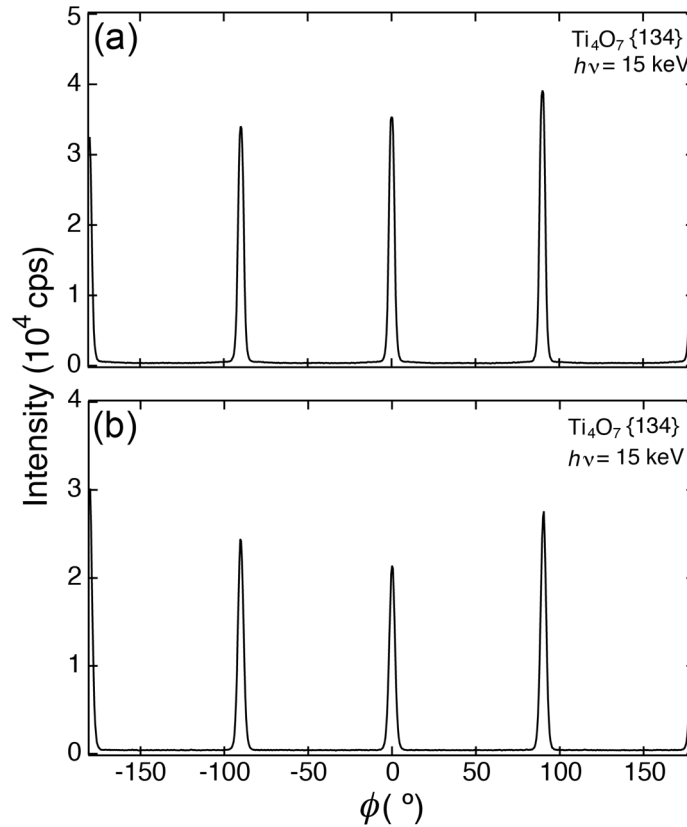

**Figure S5.** XRD azimuth  $\phi$ -scans of the  $\text{Ti}_4\text{O}_7$  134 reflections for the (a) insulating and (b) superconducting  $\text{Ti}_4\text{O}_7$  films.

### XRD measurements for the $\gamma$ -Ti<sub>3</sub>O<sub>5</sub> film

Figure S6 shows contour map of film- and substrate-reflections profiles intensity, plotted against scattering angle  $2\theta$  and tilt angle  $\chi$ , for the  $\gamma$ -Ti<sub>3</sub>O<sub>5</sub> film grown on  $\alpha$ -Al<sub>2</sub>O<sub>3</sub> (0001) substrates. The  $d$  values of interplanar spacing distances,  $\chi$  angles obtained by synchrotron radiation XRD measurements (Figs. S7), and corresponding the Miller indices are listed in Table S3. For the  $\gamma$ -Ti<sub>3</sub>O<sub>5</sub> 143 reflection, the XRD azimuth  $\phi$ -scan around the film normal was also carried out (Fig. S8). The reflections appeared every 60°, indicating the six-fold rotational domains in the film. The in-plane (out-of-plane) orientation relationships were determined to be  $\gamma$ -Ti<sub>3</sub>O<sub>5</sub> [100] //  $\alpha$ -Al<sub>2</sub>O<sub>3</sub> [10-10], [01-10], [-1100] and  $\gamma$ -Ti<sub>3</sub>O<sub>5</sub> [-100] //  $\alpha$ -Al<sub>2</sub>O<sub>3</sub> [10-10], [01-10], [-1100] ( $\gamma$ -Ti<sub>3</sub>O<sub>5</sub> [011] //  $\alpha$ -Al<sub>2</sub>O<sub>3</sub> [0001]). Using the  $d$  values and Miller indices, we evaluated the lattice parameters of the  $\gamma$ -Ti<sub>3</sub>O<sub>5</sub> film in Table S4.



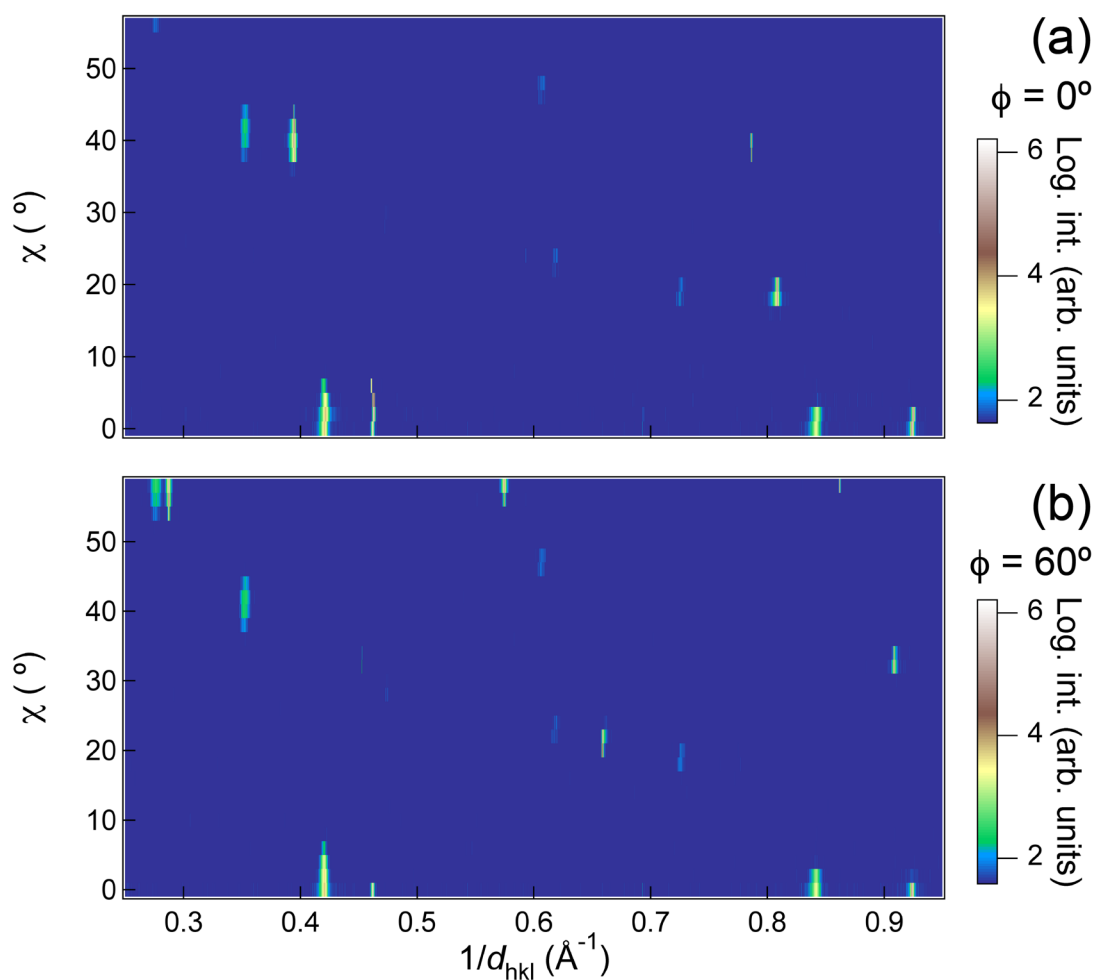

**Figure S6.** Contour map of film- and substrate-reflections intensity, constructed from  $2\theta$ - $\theta$  XRD measured by stepwisely varying tilt angle  $\chi$  while fixing azimuth angle (a)  $\phi = 0^\circ$  and (b)  $\phi = 60^\circ$  for the  $\gamma$ -Ti<sub>2</sub>O<sub>3</sub> film grown on  $\alpha$ -Al<sub>2</sub>O<sub>3</sub> (0001) substrates.

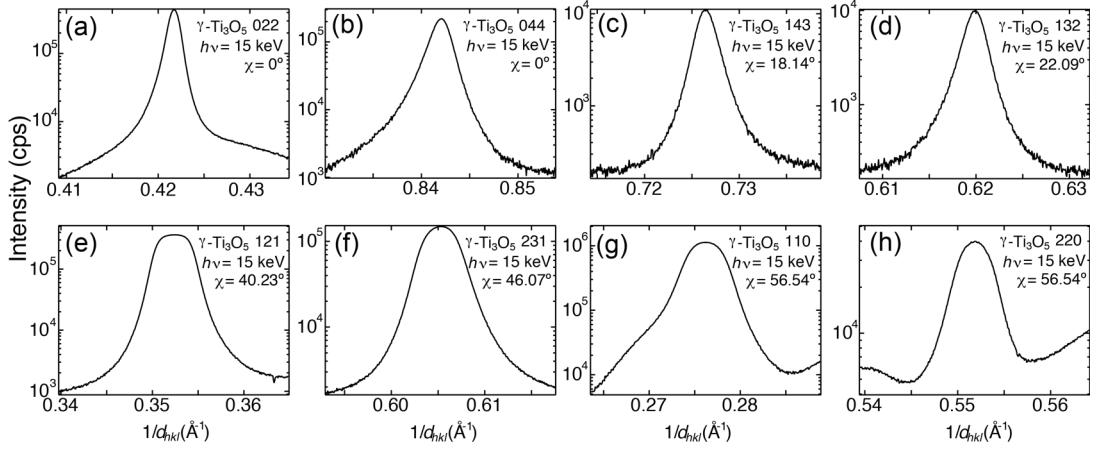

**Figure S7.** Some of the film-reflection profiles measured for the  $\gamma$ -Ti<sub>3</sub>O<sub>5</sub> film. (a) 022, (b) 044, (c) 143, (d) 132, (e) 121, (f) 231, (g) 110, and (h) 220 reflections.

**Table S3.** List of Miller indices,  $d$  values of interplanar spacing distances, and tilt angle  $\chi$  for the  $\gamma$ -Ti<sub>3</sub>O<sub>5</sub> film.

| No | $hkl$ | $d_{hkl}$ (Å) | $\chi$ (°) |
|----|-------|---------------|------------|
| 1  | 022   | 2.375         | 0          |
| 2  | 044   | 1.188         | 0          |
| 3  | 143   | 1.377         | 18.14      |
| 4  | 132   | 1.613         | 22.09      |
| 5  | 121   | 2.839         | 40.23      |
| 6  | 231   | 1.652         | 46.07      |
| 7  | 110   | 3.620         | 56.54      |
| 8  | 220   | 1.812         | 56.54      |

**Table S4.** List of lattice parameters of the  $\gamma\text{-Ti}_3\text{O}_5$  film. The cell parameters of bulk  $\gamma\text{-Ti}_3\text{O}_5$  are also listed for comparison [4].

|              | $\gamma\text{-Ti}_3\text{O}_5$ film | Bulk $\gamma\text{-Ti}_3\text{O}_5$ |
|--------------|-------------------------------------|-------------------------------------|
| $a$ (Å)      | 4.99                                | 5.0747                              |
| $b$ (Å)      | 9.80                                | 9.9701                              |
| $c$ (Å)      | 7.06                                | 7.1810                              |
| $\alpha$ (°) | 110.3                               | 109.865                             |

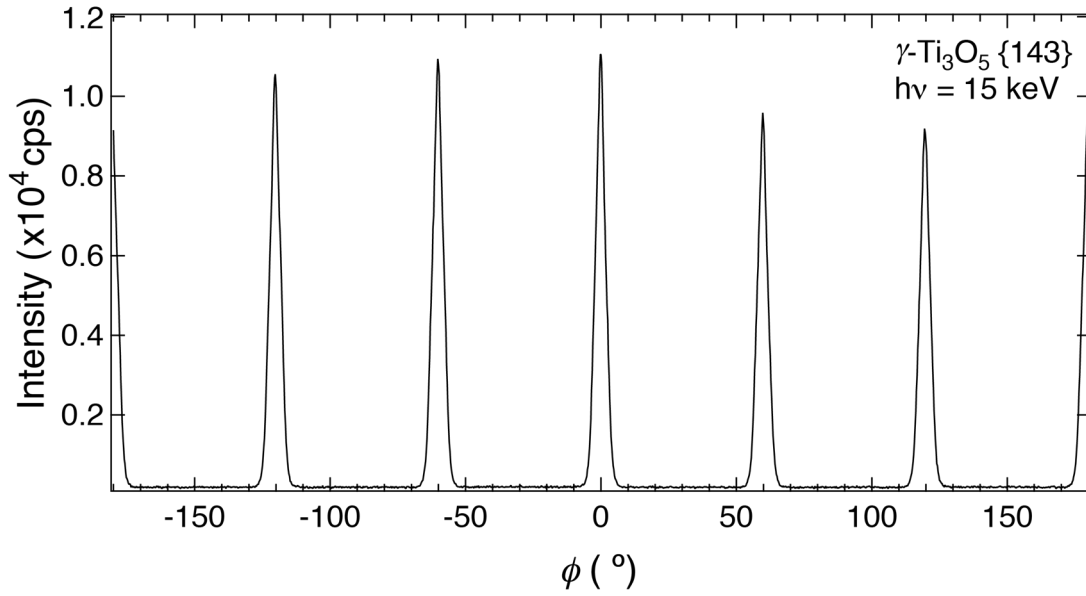

**Figure S8.** XRD azimuth  $\phi$ -scans of the  $\gamma\text{-Ti}_3\text{O}_5$  143 reflections.

### Growth of $\gamma$ -Ti<sub>3</sub>O<sub>5</sub> and insulating Ti<sub>4</sub>O<sub>7</sub> films in the same run

When both of  $\alpha$ -Al<sub>2</sub>O<sub>3</sub> (0001) and LSAT (100) substrates were loaded in the PLD chamber, titanate films with different structures were obtained under the condition where insulating Ti<sub>4</sub>O<sub>7</sub> films were obtained on the LSAT (100) (substrate temperature of 900°C and oxygen partial pressure of  $1 \times 10^{-7}$  Torr). Figure S9(a) shows out-of-plane XRD patterns of the titanate films grown on  $\alpha$ -Al<sub>2</sub>O<sub>3</sub> (0001) and LSAT (100) substrates. The reflections coming from the titanate films were found at  $2\theta = 37.83$  and  $42.38^\circ$ . The former and latter were identical to the detection angles of  $\gamma$ -Ti<sub>3</sub>O<sub>5</sub> 022 and Ti<sub>4</sub>O<sub>7</sub> 202 reflections, respectively. Moreover, from the temperature dependence of resistivity [Fig. S9(b)], superconductivity (metal-insulator transition) was observed for the  $\gamma$ -Ti<sub>3</sub>O<sub>5</sub> (Ti<sub>4</sub>O<sub>7</sub>) films.

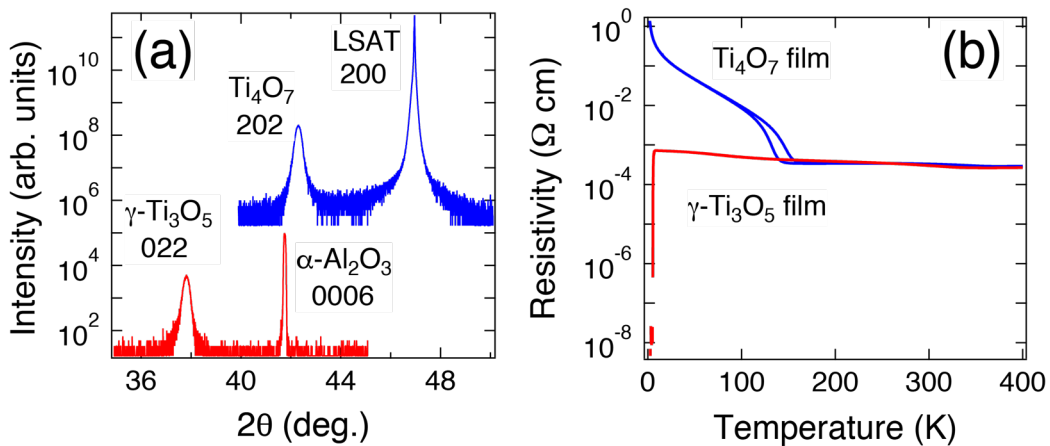

**Figure S9.** (a) Out-of-plane XRD patterns and (b) temperature dependence of resistivity for Ti<sub>4</sub>O<sub>7</sub> and  $\gamma$ -Ti<sub>3</sub>O<sub>5</sub> films grown in the same run.

### Superconductivity in $\text{Ti}_x\text{O}_7$ films grown under $P_{\text{Ar}} = 1 \times 10^{-6}$ Torr

Figure S10 shows temperature dependence of resistivity for the  $\text{Ti}_x\text{O}_7$  film grown under  $P_{\text{Ar}} = 1 \times 10^{-6}$  Torr. The  $P_{\text{O}_2}$  (residual oxygen gases) in the chamber is expected to be in an intermediate range between those for the growth of insulating ( $P_{\text{O}_2} = 1 \times 10^{-7}$  Torr) and superconducting ( $P_{\text{Ar}} = 1 \times 10^{-3}$  Torr) films. Clear hysteresis was found at around 150 K [Fig. S10(a)], corresponding to the metal-insulator transition (MIT) in the normal state. In addition, the superconducting state was also found at low temperatures [Fig. S10(b)].  $T_{\text{C, onset}}$  of 2.9 K was slightly lower than that described in the main text. The emergence of the MIT and superconductivity in a sample supports bipolaronic mechanism in the  $\text{Ti}_x\text{O}_7$  film.

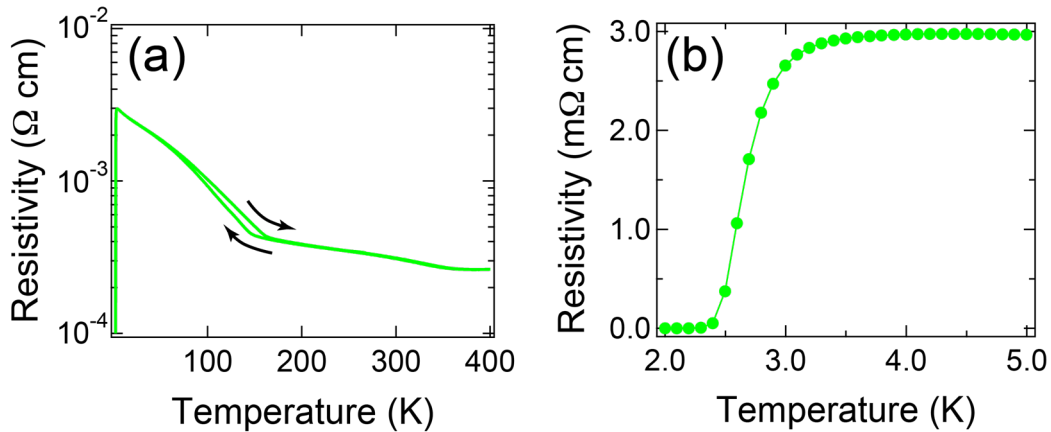

**Figure S10.** Temperature dependence of resistivity for the  $\text{Ti}_x\text{O}_7$  film grown under  $P_{\text{Ar}} = 1 \times 10^{-6}$  Torr (a) in the whole and (b) a low-temperatures range.

### **Superconductivity in $\text{Ti}_4\text{O}_7$ films grown on $\text{MgAl}_2\text{O}_4$ (100) substrates**

Crystal structure of the  $\text{Ti}_4\text{O}_7$  film grown on  $\text{MgAl}_2\text{O}_4$  (100) substrate was investigated by XRD with  $\text{Cu K}\alpha_1$  radiation. Figure S11(a) shows  $2\theta$ - $\theta$  XRD patterns of the film with various tilt angle  $\chi$ . For comparison,  $2\theta$ - $\theta$  XRD patterns of the  $\text{Ti}_4\text{O}_7$  film grown on LSAT (100) substrate were shown in Fig. S11(b). The film reflections were found at the similar angles, indicating that the film on  $\text{MgAl}_2\text{O}_4$  (100) substrate was out-of-plane (101)-oriented  $\text{Ti}_4\text{O}_7$ .

Figure S12 shows temperature dependence of resistivity for the film. The resistivity curve was in good agreement with that grown under  $P_{\text{Ar}} = 1 \times 10^{-3}$  Torr on LSAT (100) substrate. Superconductivity was clearly observed at low temperatures. Emergence of superconductivity of  $\text{Ti}_4\text{O}_7$  films on the different substrates confirms that superconducting phase at low temperatures is intrinsic to the  $\text{Ti}_4\text{O}_7$  films themselves. Furthermore, superconductors composed of Mg, Al, Ti, and O with  $T_c$  of more than 3 K are not yet known.

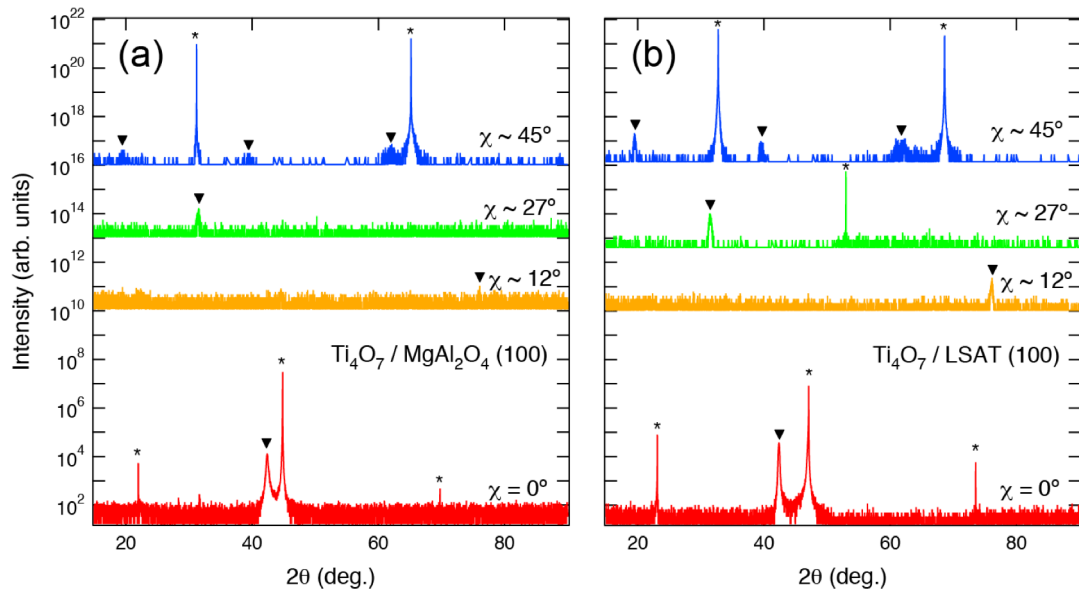

**Figure S11.**  $2\theta$ - $\omega$  XRD patterns of  $\text{Ti}_4\text{O}_7$  films grown on (a)  $\text{MgAl}_2\text{O}_4$  (100) and (b) LSAT (100) substrates with various tilt angle  $\chi$ . The asterisks and triangles indicate the substrates and films reflections, respectively.

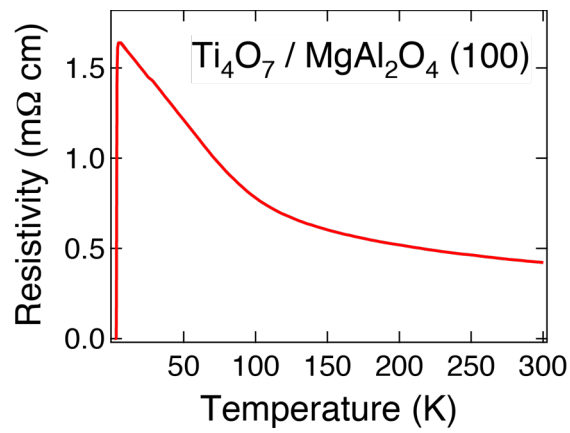

**Figure S12.** Temperature dependence of resistivity for  $\text{Ti}_4\text{O}_7$  film grown on  $\text{MgAl}_2\text{O}_4$  (100) substrate.

## References

- [S1] M. A. Afifi *et al.*, "Transport properties of polycrystalline  $\text{TiO}_2$  and  $\text{Ti}_2\text{O}_3$  as semiconducting oxides" *J. Alloys Compd.* **455**, 92 (2008).
- [S2] I. Sunagawa *et al.*, "Observation and interpretation of eccentric growth spirals" *J. Cryst. Growth* **42**, 121 (1977).
- [S3] C. Schlenker *et al.*, "Metal-insulator transitions and phase diagram of  $(\text{Ti}_x\text{V}_x)\text{O}_7$ : electrical, calorimetric, magnetic and EPR studies" *J. Phys. C: Solid State Phys.* **12**, 3503 (1979).
